# Supplementary material
Source: PubMed Central journal article supplement (PMC5406369)
Supplement: mmc2.pdf [file mmc2.pdf]

# Determining the Spatial Relationship of Membrane-Bound Aquaporin-4 Autoantibodies by STED Nanoscopy

John N. Soltys,<sup>1</sup> Stephanie A. Meyer,<sup>2</sup> Hannah Schumann,<sup>3</sup> Emily A. Gibson,<sup>2</sup> Diego Restrepo,<sup>4</sup> and Jeffrey L. Bennett<sup>3,5,\*</sup>

<sup>1</sup>Medical Scientist Training and Neuroscience Graduate Training Programs, <sup>2</sup>Department of Bioengineering, <sup>3</sup>Department of Neurology, <sup>4</sup>Department of Cell and Developmental Biology, and <sup>5</sup>Department of Ophthalmology, University of Colorado Anschutz Medical Campus, Aurora, Colorado

**ABSTRACT** Determining the spatial relationship of individual proteins in dense assemblies remains a challenge for superresolution nanoscopy. The organization of aquaporin-4 (AQP4) into large plasma membrane assemblies provides an opportunity to image membrane-bound AQP4 antibodies (AQP4-IgG) and evaluate changes in their spatial distribution due to alterations in AQP4 isoform expression and AQP4-IgG epitope specificity. Using stimulated emission depletion nanoscopy, we imaged secondary antibody labeling of monoclonal AQP4-IgGs with differing epitope specificity bound to isolated tetramers (M1-AQP4) and large orthogonal arrays of AQP4 (M23-AQP4). Imaging secondary antibodies bound to M1-AQP4 allowed us to infer the size of individual AQP4-IgG binding events. This information was used to model the assembly of larger AQP4-IgG complexes on M23-AQP4 arrays. A scoring algorithm was generated from these models to characterize the spatial arrangement of bound AQP4-IgG antibodies, yielding multiple epitope-specific patterns of bound antibodies on M23-AQP4 arrays. Our results delineate an approach to infer spatial relationships within protein arrays using stimulated emission depletion nanoscopy, offering insight into how information on single antibody fluorescence events can be used to extract information from dense protein assemblies under a biologic context.

## INTRODUCTION

Protein spatial distribution within larger assemblies is often intimately linked to protein function. Historical approaches to visualize protein distribution at high spatial resolution have been largely limited to electron microscopy, as conventional light microscopy is restricted to low spatial resolution (~200–300 nm laterally) (1). In stimulated emission depletion (STED) nanoscopy, optical superresolution is obtained by depletion of the fluorescence emission peripheral to the excitation beam target. Depletion is elicited by a redshifted STED beam that is shaped into a donutlike intensity distribution for two-dimensional (2D) resolution enhancement (2,3), with the zero intensity centered over the excitation beam. The STED beam effectively switches off fluorescent molecules in the periphery of the excitation spot, but not in the zero-intensity center. As a result, STED nanoscopy increases resolution down to tens of

nanometers, allowing for novel studies of protein spatial distribution and function. For example, STED localization of surface protein assemblies has provided insight into both vesicular membrane protein recycling and HIV-1 host cell infectivity (4,5).

It remains a challenge to identify the geometric arrangement and stoichiometry of individual proteins within larger assemblies *in vivo*. The light emitted by a single fluorophore forms a Gaussian intensity distribution—a finite-sized spot—that will blend with light emitted by other fluorophores when packed at high densities. Recognizing individual proteins within dense assemblies often requires restrictive experimental conditions that perturb the model system away from the *in vivo* environment to reorganize protein assemblies into resolvable components or to observe real-time protein dynamics (6). In addition, fluorophore tags or secondary fluorescent antibodies may interfere with normal structural arrangement or biological function. Access to primary and secondary antibody epitopes and variable labeling efficiency pose further imaging challenges (7). Finally, uncertainty in the orientation of the

Submitted April 19, 2016, and accepted for publication March 15, 2017.

\*Correspondence: [jeffrey.bennett@ucdenver.edu](mailto:jeffrey.bennett@ucdenver.edu)

Editor: Laurent Blanchoin.

<http://dx.doi.org/10.1016/j.bpj.2017.03.012>

© 2017 Biophysical Society.

fluorophores and the target protein itself provide additional restrictions. A better understanding of how individual fluorophores can be resolved at higher densities in a nondisruptive biologic context would allow for the development of more rigorous methods to correlate spatial protein distributions with functional outcomes.

In the central nervous system (CNS) disorder neuromyelitis optica (NMO), aquaporin-4 autoantibodies (AQP4-IgG) bind to the extracellular domains of AQP4 tetramers expressed by CNS astrocytes and initiate injury via classical complement pathway activation (8–11). High-level classical pathway activation is triggered when multimeric contacts are made between the complement protein C1q and membrane-bound antibodies (12,13). Elucidating the molecular mechanisms driving the formation of multimeric contacts between C1q and aquaporin-4-(AQP4) recombinant antibody (rAb) within the C1q–AQP4-IgG–AQP4 complex is therefore of considerable interest to combat CNS injury in NMO. AQP4-IgG will only activate C1q when AQP4-IgG binds over large arrays of AQP4 protein termed “orthogonal arrays of particles” (OAP), suggesting that high density binding of AQP4-IgG to AQP4 arrays facilitates multivalent C1q-antibody contacts and complement activation (14). We have generated a large repertoire of AQP4-specific monoclonal rAbs from NMO patient cerebrospinal fluid plasmablasts, allowing us to test this hypothesis by visualizing multiple unique antibody binding patterns both as isolated binding events and in larger clusters.

Due to its deterministic technique, STED nanoscopy is well suited to dissect blended fluorescence emission after the recognition of single fluorescence events. Here, we use STED nanoscopy to analyze these isolated and blended fluorescence patterns produced by AQP4-IgG to develop a framework for evaluating dynamic changes in protein distribution in a biologic context. The result is an algorithm that deconstructs blended fluorescence emission patterns to infer the distribution of fluorophore molecules without direct resolution. Application of this algorithm to STED images of multiple AQP4 rAbs bound to AQP4 tetramers and OAPs demonstrates an unappreciated role that target epitopes may play in organizing C1q–AQP4-IgG–AQP4 complexes.

## MATERIALS AND METHODS

### Cell samples and AQP4 autoantibodies

Monoclonal anti-AQP4 rAbs were generated from NMO patient CSF as described in Bennett et al. (15), and bound to live CHO cells stably expressing pure M1-AQP4 or M23-AQP4. Each AQP4 rAb binds a unique extracellular epitope (16). AQP4 tetramers and OAPs were labeled with a rabbit polyclonal anti-human AQP4 antibody specific to the intracellular C terminus (Santa Cruz Biotechnology, Santa Cruz, CA) and detected with goat anti-rabbit STAR590 (Rockland Immunochemicals, Limerick, PA). Extracellular AQP4 rAb was detected with biotinylated Fab goat anti-human Fc (Novus Biologicals, Littleton, CO) and streptavidin-conjugated Atto647N (Atto-Tec, Siegen, Germany; see the [Supporting Material](#)).

## Image acquisition and analysis

STED images were obtained on a noncommercial two-color STED nanoscope at the Anschutz Medical Campus Light Microscopy Core. The nanoscope is described in Meyer et al. (17); lateral resolution was calculated by imaging FluoSpheres carboxylate-modified microspheres, 0.02  $\mu\text{m}$ , filled with dark-red fluorescent fluorophores (660/680, ThermoFisher Cat. No. F8783; Thermo Fisher Scientific, Waltham, MA)  $\pm$  unconjugated Atto647N fluorophores (Atto-Tec). Details on acquired and simulated image acquisition, processing and quantitative analyses are described in [Supporting Material](#).

## RESULTS

### Characterizing STED nanoscope resolution using a biologic approach

To establish a framework for evaluating dynamic changes in fluorescence emission summation patterns based on fluorophore spatial distribution, we first considered the biological variables that may influence fluorophore spatial distribution. In astrocytes, AQP4 is expressed in two isoforms: M1-AQP4 and M23-AQP4. M1- and M23-AQP4 are coassembled into tetramers with differential abilities to coalesce into larger orthogonal arrays of particles (OAPs) (18,19). M1-AQP4 inhibits OAP assembly and, when solely expressed, assembles into isolated plasma membrane tetramers. In distinction, M23-AQP4 facilitates AQP4 tetramer assembly into larger OAPs that may span hundreds of nanometers in size. Based on the relative size of an AQP4 tetramer (8–9 nm) and IgG (12–15 nm), only a single AQP4 rAb molecule is presumed to bind to a M1-AQP4 tetramer, whereas multiple rAbs may bind to the surface of M23-AQP4 OAPs ([Fig. 1, A and B](#)) (20). In this model, single antibodies bound to plasma membrane M1-tetramers should be readily resolved because the distance between fluorophores is large compared to the resolution of the STED nanoscope ([Fig. 1 C](#)). In contrast, on M23-AQP4 OAPs, the short distance between bound AQP4 rAbs may allow fluorophores to cluster at distances smaller than the resolution of the STED nanoscope, thereby interfering with the detection of discrete binding events. As a result, on OAPs, fluorescent signal may represent multiple antibodies binding in close proximity (a cluster), rather than a single antibody molecule ([Fig. 1 D](#)).

It is also possible that the geometric arrangement of targeted AQP4 epitopes may influence the ability for AQP4 rAb to bind in dense clusters over larger arrays ([Fig. 1 B](#)). Biochemical single amino acid epitope mapping has demonstrated that AQP4 rAb vary in both the number of extracellular loops contacted and the amino acids contacted within each loop (16). It is unclear if the epitope surface area overlies a single AQP4 monomer or spans multiple monomers within each tetramer (20); the global arrangement of all extracellular loops within the tetramer is compatible with each possibility but favors contacts spanning AQP4 monomers. Targeted epitopes may therefore differ in amino acids contacted, overall size, and geometric patterning across

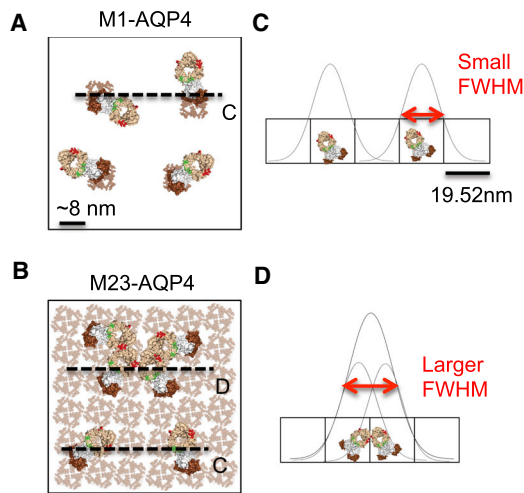

**FIGURE 1** AQP4 autoantibodies have the potential to bind in multiple spatial distributions to M1-AQP4 and M23-AQP4. (A and B) Surface schematics of AQP4 rAbs bound to cell surface AQP4. (A) M1-AQP4 tetramers repel each other on the cell membrane, resulting in isolated, bound AQP4 autoantibodies. (B) M23-AQP4 organizes into large arrays on a cell membrane, offering the potential for multiple spatial distributions of bound autoantibodies depending on epitope geometry and organization. (C and D) The size of a resolvable object, defined as the FWHM of a Gaussian fit, is proportional to the size of antibody clusters given the size of each pixel relative to the size of a single antibody. The antibody distributions in (C) and (D) represent the distributions indicated by dashed lines in (A) and (B), with STED pixel coordinates and a theoretical Gaussian fit superimposed.

AQP4 tetramers and OAPs. Furthermore, steric considerations may influence epitope availability. Epitopes whose area crosses the center point of the AQP4 tetramer would have at least partially overlapping surface areas given the fourfold symmetry of an individual tetramer; consequently only one of four available epitopes could be occupied at any given time. Alternatively, a bound antibody could mask neighboring epitopes given the larger size of an antibody (~10–15 nm) relative to the size of an AQP4 tetramer. Thus, while targeted epitopes theoretically are distributed uniformly across M23-AQP4 OAPs to permit high-density antibody binding, binding could be limited to lower densities if the accessible pool of vacant epitopes is restricted by AQP4 epitope geometry and steric considerations. We therefore hypothesized that the observed heterogeneity of target epitopes across M23-AQP4 OAPs would produce nonuniform patterns of AQP4 rAb binding with differing abilities to form dense protein assemblies: some target epitopes may be spaced to permit large numbers of AQP4 rAb binding in close proximity (Fig. 1 B, line D), whereas others may restrict rAb binding in close proximity (Fig. 1 B, line C). Consequently, some monoclonal AQP4 rAbs may appear as similar-sized objects on both AQP4 isoforms, while others may appear as larger objects on M23-AQP4 OAPs (Fig. 1, B–D).

To test these hypotheses, several individual monoclonal AQP4 autoantibodies recognizing unique AQP4 extracel-

ular epitopes were bound to live cells expressing either M1-AQP4 or M23-AQP4 and imaged via STED nanoscopy. The fluorophore labeling approach takes advantage of monoclonal antibody labels to isolate Atto647N fluorophores (Fig. 2 A), and all AQP4 tetramers are intracellularly labeled with a distinct commercial antibody to eliminate competition for extracellular rAb epitopes. AQP4 rAb bound to M1-AQP4 consistently appeared as single pixels that directly overlaid or neighbored an AQP4 tetramer; the bulk size of the intracellular antibody labeling approach has the potential to place the labeling fluorophore on a neighboring pixel (Fig. 2, A and C). Comparison to confocal images of rAb in identical fields of view reveals significant resolution improvement with STED (Fig. 2, B and C). A least-squares 2D Gaussian fit over isolated peaks quantified rAb appearance over M1-AQP4, yielding a mean peak full width at half-maximum (FWHM) of  $29.1 \pm 8.7$ ,  $29.1 \pm 7.3$ , and  $28.4 \pm 6.5$  nm for rAbs #53 ( $n = 102$ ), #58 ( $n = 105$ ), and #186 ( $n = 99$ ), respectively, congruent with the mean appearance of rAb signal (Fig. 2 C, right). These mean peak FWHM are consistent with the appearance of Atto647N fluorophores when imaged in the same focal plane as 28 nm fluorescent beads filled with dark-red 660/680 fluorophores sampled at both 10 and 20 nm pixel sizes (Figs. S1 and S2; one-way ANOVA,  $p = 0.90$ ). Single pixel localization was further verified via imaging of serial fluorophores dilutions when imaged at 20 nm pixel sampling size (Fig. S1); single pixels also fluoresced across three repetitive images in the same field of view for  $19.2 \pm 1.0\%$  of events despite photobleaching (data not shown). Hence, in our imaging system, rAb fluorescence over M1-AQP4 definitively localizes to single 20 nm pixels with a mean peak FWHM of <30 nm.

### rAb bind in multiple arrangements over M1- and M23-AQP4

We next addressed how the appearance of rAb bound over M1-AQP4 could be exploited to test for differing spatial arrangements when the same rAb is bound over M23-AQP4. We first asked if we could detect gross changes in rAb clustering for rAb bound over M1- versus M23-AQP4 as rationale for pursuing more rigorous deconstructions of fluorescence blur. rAb clustering was analyzed by calculating the FWHM of a 2D Gaussian fit (herein called  $\text{FWHM}^{\text{rAb spread}}$ ) for the 2D array representing mean blur across an entire image, acquired using an adapted blinded deconvolution algorithm based on a maximum likelihood algorithm (21). Differences in  $\text{FWHM}^{\text{rAb spread}}$ , arising from differing fluorescence summation patterns, indicate distinct spatial distributions of bound fluorophores given the relative size of a single antibody compared to the STED pixel dimensions (12–15 vs. 19.52 nm, respectively; Fig. 1, C and D). As anticipated by AQP4 membrane biology, the  $\text{FWHM}^{\text{rAb spread}}$  for all three unique AQP4 rAb bound

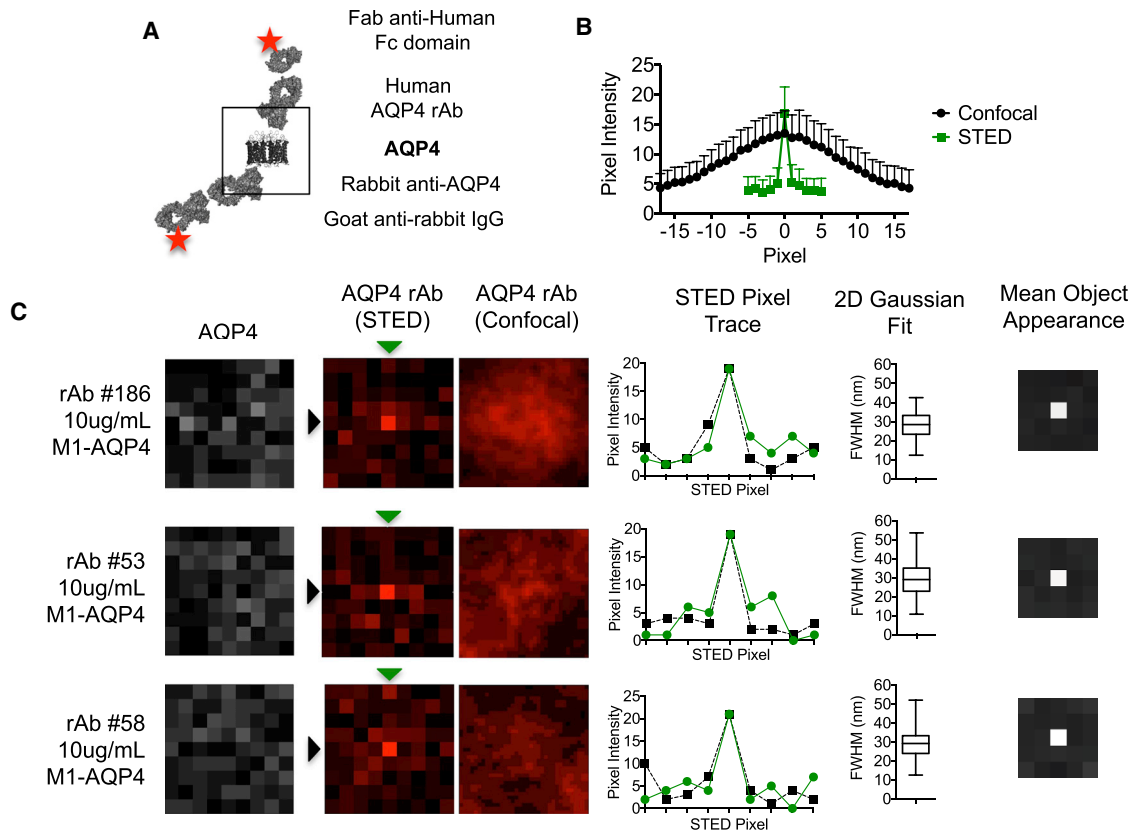

**FIGURE 2** STED imaging of AQP4 rAb over M1-AQP4. (A) Depiction of labeling scheme is given. Red stars indicate position of fluorophore label. Box represents size of  $19.5 \times 19.5$  nm STED pixel; the schematic is approximately to scale. (B) Pixel intensity traces for STED and confocal detection of binding events over M1-AQP4 are given. Data represents  $n = 30$  events ( $n = 10$  each for rAbs #53, #58, #186). (C) Representative STED and confocal images of antibodies binding to AQP4 are given. Pixel intensity traces for all STED rAb rows/columns labeled with an arrowhead are shown immediately adjacent. The mean peak FWHM quantifications using a least-squares 2D Gaussian fit, and the mean object appearance for rAbs #186 ( $n = 99$ ), rAb #53 ( $n = 102$ ), and rAb #58 ( $n = 105$ ), are depicted on far right. Scale: all image pixels are  $19.5 \times 19.5$  nm.

over M1-AQP4 was similar to both single fluorophore point sources and fluorescently labeled antibodies randomly immobilized on glass coverslips (Fig. 3 D, one-way ANOVA,  $p = 0.16$ ). The data establishes the base  $\text{FWHM}^{\text{rAb spread}}$  of the predominant fluorescence signal, and further supports that the majority of resolvable objects for AQP4 rAb bound to M1-AQP4 tetramers represent isolated antibodies on the cell surface.

In contrast, the  $\text{FWHM}^{\text{rAb spread}}$  for rAb bound to M23-AQP4 OAPs increased significantly for multiple AQP4 rAb antibodies. At  $10 \mu\text{g/mL}$ , the  $\text{FWHM}^{\text{rAb spread}}$  for rAb #58 was similar between M1-AQP4 tetramers and M23-AQP4 OAPs; however, the mean  $\text{FWHM}^{\text{rAb spread}}$  for rAbs #53 and #186 were significantly larger (Fig. 3 D), suggesting an epitope-dependent clustering of antibody on M23-AQP4 OAPs (Fig. 3, A, B, and D). To test this conclusion, we introduced a point mutation (E345R) into the Fc domain of several AQP4 rAbs to promote the assembly of individual antibodies into larger surface clusters (22). AQP4 antibodies containing the E345R Fc mutation were detected as larger rAb clusters compared to their wild-type counterparts (Fig. 3, A, C, and D). Increasing antibody concentrations did not significantly

shift the distribution of the  $\text{FWHM}^{\text{rAb spread}}$  for rAb #58, #186, and #153, demonstrating that the increase in cluster size represented an antibody-intrinsic, epitope-driven phenomenon rather than a random juxtaposition of multiple independent binding events on AQP4 OAPs (Fig. 3 D). Interestingly, the  $\text{FWHM}^{\text{rAb spread}}$  for rAb #53 trended toward a significant increase at higher concentrations on M23-AQP4 OAPs ( $21 \pm 3$  nm at  $2 \mu\text{g/mL}$  versus  $33 \pm 3$  nm at  $10 \mu\text{g/mL}$ ; Tukey's adjusted  $p = 0.055$ ), suggesting that increased occupancy of rAb #53 epitopes facilitated surface clustering over this concentration range. In summary, manipulation of AQP4 assembly (M1-AQP4 tetramers versus M23-AQP4 OAPs) and rAb interaction (E345R Fc mutation) allowed us to detect shifting spatial arrangements of AQP4 rAbs on the cell surface.

### Generation of score of antibody spatial arrangement

The spatial arrangement of antibody molecules bound over surface epitopes may have a profound impact on antibody Fc-domain mediated effector function activation (22). For

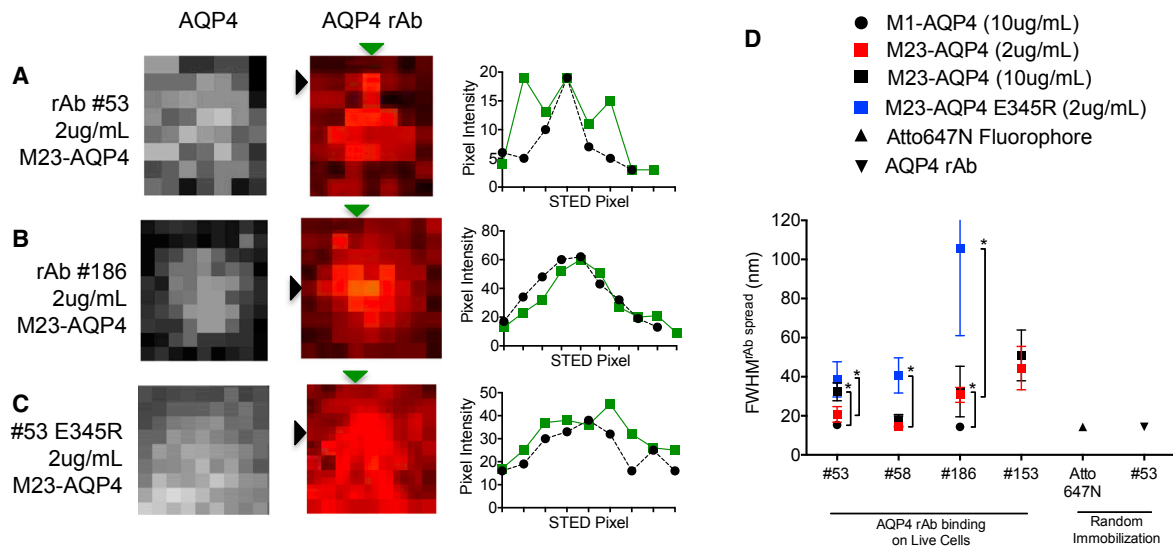

**FIGURE 3** Quantification of cluster spread for rAb bound over M1- and M23-AQP4. (A–C) Representative antibody images are shown for several AQP4 autoantibodies binding to M23-AQP4. An intracellular antibody (*left*) detects all AQP4; extracellular autoantibody binding (*middle*) is shown with pixel intensity traces (*right*) for all rows/columns labeled with an arrow. (D) Calculated mean FWHM<sup>Ab</sup> spread across an entire image. Data was compared using one-way ANOVA with Tukey’s test for multiple comparisons (\*, adjusted  $p < 0.05$ ). STED image scale:  $19.5 \times 19.5$  nm/pixel. Scale: all image pixels are  $19.5 \times 19.5$  nm.

example, effector complement activation requires C1q binding to multiple antibodies on a target surface (Fig. 4 A). The target surface likely organizes antibodies into clusters that facilitate multivalent C1q contacts, as isolated bound antibodies would more closely resemble circulating monomeric antibodies that have only a low affinity for C1q. Indeed, the limited ability of AQP4 rAb to bind C1q and activate the classical complement pathway over M1-AQP4 suggests that the spatial organization of bound antibodies contributes to complement activation (14). We therefore formulated a metric to quantify the C1q multivalent binding potential for antibody spatial arrangements, based on the mean appearance of rAb binding over M1-AQP4 (Fig. 2 C), to ask if fluorophore spread within variable blended fluorescence patterns could be more rigorously dissected.

C1q has a stem-and-tulips structure, with each of the six stems containing a globular head that is able to bind to an antibody Fc domain (Fig. 4 A). While there are multiple spatial distributions of AQP4 rAb that can support multivalent C1q binding, a hexamer pattern potentially represents a best-fit solution that can engage each of the globular heads (22). When superimposed over STED image pixel dimensions, multivalent C1q binding has the potential to occur across four pixels in a  $2 \times 2$  pixel area (Fig. 4 B, top). We developed a four-point scoring system to quantify the probability of multivalent C1q binding termed the “antibody spatial arrangement” (ASA) score. Each pixel from a processed image receives a ranked integer score (1–4) based on the maximum number of neighboring pixels with signal intensity across a  $2 \times 2$  area (Fig. 4 B, bottom). ASA score 1 represents an isolated binding event with low probability for

multivalent binding, whereas ASA score 4 represents a dense cluster with the highest probability for multivalent C1q binding. The effective application of this scoring system across an entire cell (Fig. 4 C) is dependent on the ability to localize a fluorophore to each pixel, consistent with the imaging of isolated Atto647N fluorophores (Fig. S1). However, because individual fluorophores cannot theoretically be resolved on neighboring pixels (see Fig. 1, C and D), a series of data simulations were performed to reconstruct single binding events (as observed on M1-AQP4) within denser clusters (as observed on M23-AQP4) to test the possibility of developing an image processing algorithm that can assign fluorophores to any given pixel in an otherwise nonresolvable object.

### Data simulations validate the ASA algorithm

Random fluorophore distributions were generated to model antibody spatial distributions over 100 AQP4 arrays on a simulated cell (Fig. 5 A, top left). Two simulated images were generated for each random distribution. In one image, STED image pixel dimensions were immediately superimposed to create a binary image where each pixel with an intensity value represents a pixel containing at least one Gaussian fluorophore peak (Fig. 5 A, middle left). In a second image, each fluorophore was convolved based on the appearance of single rAb #58 binding events over M1-AQP4. STED image pixel dimensions were then superimposed over the second image to generate a simulated image representing a STED image for that particular fluorophore distribution (Fig. 5 A, top right).

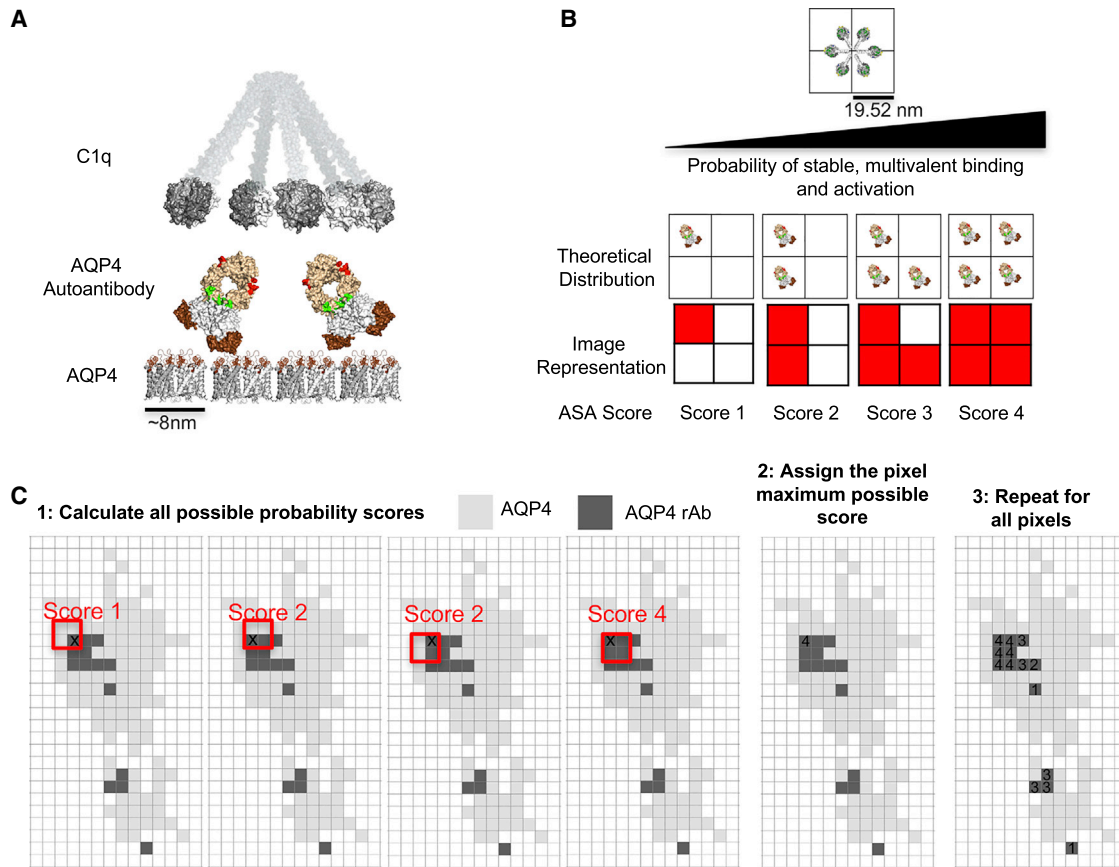

**FIGURE 4** A method to score rAb antibody scaffolds that interact with C1q. (A) A schematic of C1q interacting with membrane-bound AQP4 autoantibodies demonstrating the potential assembly of multivalent autoantibodies on AQP4 OAPs is shown. (B) (Top) Top-down depiction of a C1q molecule superimposed over STED pixel coordinates is given. (Bottom) Schematic paradigm for scoring distributions of AQP4 antibodies that support multivalent C1q binding is given. (C) Sample application of the ASA scoring system to a theoretical STED image is given. The ASA score is determined in an iterative fashion using code from the software MATLAB (The MathWorks, Natick, MA). All pixels with a fluorescence signal are scored for each of the four possible ASA score arrangements (1), then the pixel is assigned the maximum possible ASA score (2), and the process is repeated for all pixels across the image (3).

We then asked if a threshold could be reliably applied to identify pixels containing a fluorophore. The threshold represents a cutoff percentage where any pixel containing an intensity value below the threshold percentage (relative to the maximum local pixel intensity value over the AQP4 array) is reassigned a value of “0” to exclude the pixel from further analysis (see [Supporting Materials and Methods](#)). An intensity threshold effectively eliminates pixels with a low probability of containing a fluorophore, as any detected photon events from these pixels would have a low probability of falling within the FWHM of a single fluorophore event. After threshold application, each remaining pixel has a high probability of having a Gaussian peak of intensity falling somewhere within that pixel. Too low of a threshold would produce a high number of false positives (low specificity), while too high of a threshold would only detect the brightest events (low sensitivity). All simulated images were stepped through a series of thresholds at 5% increments to identify an endpoint with high sensitivity and specificity across a range of fluorophore densities (2.7–74.9% of array area, ~100 OAPs quantified per density). The threshold accuracy

was determined by comparing all pixels containing detected events (defined as all nonzero pixels postthreshold; [Fig. 5 B](#), middle right) to the binary image to calculate the number of true- and false positive events ([Fig. 5 B](#)). With a threshold pixel intensity cutoff of 40%, 88.2% of all fluorophores were accurately localized with a 12.6% false positive rate. Although a 35% threshold yielded similar sensitivity, this threshold produced a higher number of false positives at denser concentrations (data not shown).

We subsequently used the 40% threshold to compare the calculated ASA score distribution for all positive pixels with the actual ASA score distribution on binary control images ([Fig. 5 A](#), bottom). As anticipated from the simulation design (see [Discussion](#)), a linear relationship between calculated and actual ASA scores was not observed. However, each calculated score was readily normalized, as score distributions followed clear polynomial relationships driven by the size and complexity of blended shapes. The final algorithm was then tested with a second simulation series of random fluorophore distributions. Calculated ASA scores were highly correlated with actual ASA score distributions

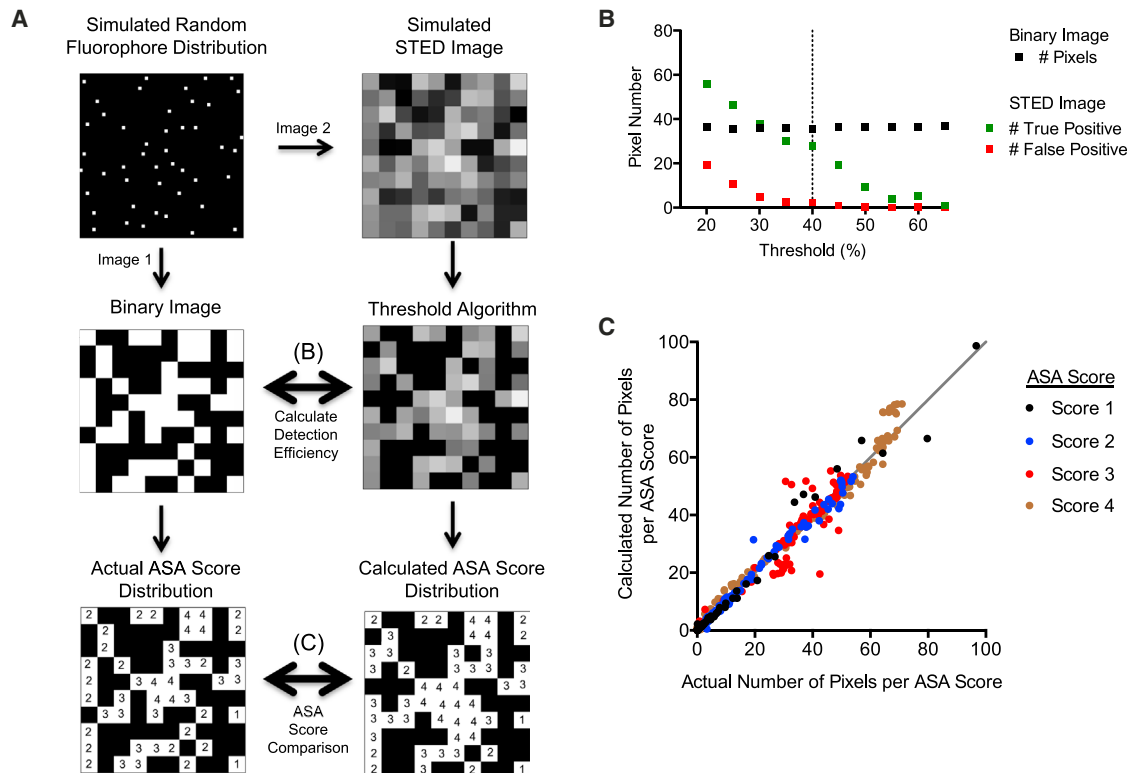

**FIGURE 5** Data simulations validate the ASA scoring system on large protein assemblies. (A) Application of the ASA scoring system to a simulated OAP distribution is given. A random fluorophore distribution is created (*top left*) and converted into both a binary image demonstrating pixels containing a fluorophore (*left middle*) and a simulated STED image (*top right*). The simulated STED image was placed through a series of experimental thresholds to test how well a threshold may identify fluorophore-containing pixels, compared to the known distribution of fluorophores (*middle row*). The ASA score for both known and calculated distributions was tallied (*bottom row*) and compared. (B) Sample AQP4 array data demonstrating the accuracy of various detection thresholds is given. (C) Quantification of the performance of the final ASA scoring algorithm using a 40% threshold on independent simulated data set is given.

for ASA scores of 1, 2, and 4 ( $r^2 = 0.98, 0.99, \text{ and } 0.98$ , respectively). ASA score 3 showed a slightly weaker correlation ( $r^2 = 0.83$ ) as the algorithm was not as accurate at higher fluorophore densities (Fig. 5 C). The best fit linear regression of each score was not significantly different from  $y = x$  ( $f = 0.62, p = 0.65$ ). When averaged across the entire data set, the total calculated distribution represented the theoretical distribution with 98% accuracy. We conclude that the geometric spread of dense protein clusters can be inferred at high probability from an otherwise nonresolvable object, given prior knowledge of how individual fluorophores are represented within the object.

### Monoclonal antibodies display different potentials for multivalent C1q binding

We evaluated STED images of AQP4 rAbs on M1- and M23-AQP4 to evaluate the multivalent binding potential of resolvable objects using the ASA scoring system. Consistent with the lack of C1q-mediated complement activation on M1-AQP4 tetramers, the ASA scores for images of AQP4 rAbs on M1-AQP4 differed significantly from images

on M23-AQP4. On M1-AQP4, the distribution of ASA scores was heavily skewed toward “1”. For rAbs #53 and 58, ASA probability scores on M23-AQP4 were skewed toward “2” or higher, despite either no detectable increase, or only a small increase in apparent  $\text{FWHM}^{\text{rAb spread}}$  relative to M1-AQP4 (Fig. 3 D and Fig. 6 A). An even larger skewing was observed for rAbs #186 and #153 binding to M23-AQP4 OAPs. The larger  $\text{FWHM}^{\text{rAb spread}}$  generated by these two antibodies (Fig. 3 D) were reflected in significantly higher median ASA scores. An identical shift in the ASA scoring distribution was produced when the clustering mutation E345R was introduced into rAbs #53, #58, and #186. Interestingly, some pixels with larger ASA scores (3 and 4) were detected at significant frequencies in images of rAbs that otherwise averaged smaller  $\text{FWHM}^{\text{rAb spread}}$  (e.g., rAbs #53 and #58). This may represent close juxtaposition of individual binding events. The optimized ASA scoring algorithm was used for the analysis for increased confidence; the overall data patterns calculated with the optimized ASA algorithm did not deviate from those that were otherwise observed using initial ASA calculations (Fig. S3). In summary, by applying a functional analysis

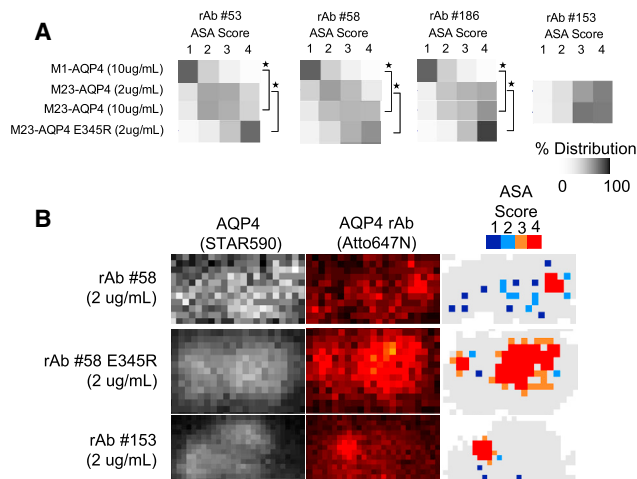

**FIGURE 6** ASA scores of membrane-bound AQP4 rAbs. (A) The ASA score distributions for multiple AQP4 rAbs are presented as a heat map representing the relative frequency of each ASA score across all OAPs (M23-AQP4) or across an entire cell (M1-AQP4). The median ASA score was significantly increased for all AQP4 rAbs on M23-AQP4 compared to M1-AQP4 and for E345R-mutated AQP4 rAbs on M23-AQP4 ( $*p < 0.001$ , Mann-Whitney). (B) Sample STED images of AQP4 (left) and AQP4 rAb (middle) for three AQP4 rAbs are given. The corresponding ASA score (right) is shown for the AQP4 rAb image (middle). Here, gray represents an AQP4 array, and each ASA score is represented by a colored pixel (1: Dark blue, 2: light blue, 3: orange, 4: red). Scale: all image pixels are  $19.5 \times 19.5$  nm.

constraint based on the dimensions of the C1q–AQP4 rAb–AQP4 complex, we were able to identify different spatial arrangements among blended fluorescence patterns produced by densely packed rAbs within a confined surface area.

## DISCUSSION

We quantified multiple spatial arrangements for membrane-bound AQP4 autoantibodies with STED nanoscopy using two distinct biologic contexts. Using relatively dispersed M1-AQP4 tetramers, we were able to visualize single antibody binding events in our STED images and subsequently use that information to develop methods to recognize differences in the spatial organization of antibodies in close proximity on M23-AQP4 arrays. The recognition of an individual binding event on M1-AQP4 also allowed us to more rigorously dissect differing spatial arrangements of dense protein clusters without the direct ability to absolutely resolve events between neighboring pixels. Distinct spatial organizations were observed for some, but not all, monoclonal rAbs when comparing images on M1- and M23-AQP4. These differences correlated with changes in spatial distribution induced by a Fc-mutation that facilitates antibody clustering, suggesting that target epitopes may be spaced and oriented on M23-AQP4 OAPs to facilitate AQP4 rAb interaction, and subsequent C1q binding in vivo. Characterizing the relationship between individual fluorophore distributions and blended fluorophore fluorescence

summation patterns provides insight into the fields of both superresolution image analysis and neuromyelitis optica.

## Superresolution imaging of protein clusters

The advent of superresolution imaging has introduced many new challenges in resolving individual proteins in vivo. Ideally, images would be obtained in a manner that allows for the resolution of individual molecular targets without compromising specificity or function. The relative size of many proteins compared to the size of the detecting fluorophore has the potential to confound precise localization and disrupt the local cellular environment. For example, our attempts to produce AQP4 rAb fusion proteins containing autofluorescent proteins resulted in disruption of both antibody binding and complement-activation (unpublished data). Labeling efficiency may also impact accuracy in quantifying protein assemblies. In our model, the C-terminal intracellular AQP4-specific commercial antibody labels entire arrays, whereas extracellular-targeted rAbs label only portions of arrays. Therefore, the two antibodies would produce different results when used to calculate the size and number of AQP4 OAPs. The impact of such labeling artifacts on image resolution was recently investigated in detail by Lau et al. (7).

Alternative superresolution imaging approaches may offer novel solutions. For example, innovative single-molecule fluorophore labeling approaches and STORM imaging have been used to investigate both the mobility of M1- versus M23-AQP4 tetramers on plasma membranes and the organization of M1- versus M23-AQP4 tetramers within OAPs (23–25). Atomic force microscopy has been used to demonstrate the potential for IgG antibodies to form hexameric assemblies (26) and for antibodies to move along repetitive surfaces and form transient antibody clusters (27). In the future, atomic force microscopy could be adapted to examine antibody hexameric assemblies on AQP4 OAPs. Regardless, overcoming the stringent lateral resolution demands imposed by protein size for resolving single proteins remains a universal challenge in constructing models of protein assemblies. For example, despite outstanding resolution, STORM imaging of AQP4 tetramers has not resolved individual AQP4 tetramers within larger arrays (23–25,28). Modeling protein crystal structures over nonatomic images may represent novel strategies (7,22).

Imaging environment, sample preparation, nanoscope design, and the efficiency of fluorophore depletion may influence STED nanoscope resolution. Deriving a PSF from larger beads is further influenced by object sampling, assumption of PSF and bead shapes, accuracy of bead size, bead integrity, and the need for deconvolution (4,29–34). Some groups have reported STED resolutions near 20 nm (29,32,35,36). In our study, we calculated a mean peak FWHM  $<30$  nm for single fluorophores despite encountering multiple challenges attributable to



pixel sampling size (Figs. 2 and S2). Both sampling at a smaller 10 nm pixel size within Nyquist criterion (Fig. S2 H) and further fluorophore manipulation of 20 nm pixels (Figs. S1 and S2) improved confidence in the calculation. To our knowledge, this is the first study reporting a FWHM calculation derived using serial fluorophore dilutions imaged in the same focal plane as larger beads (Figs. S1 and S2). The experiment provides a priori information regarding fluorophore appearance. As described by Westphal et al. (30), the application of a priori information reduces the signal demand required to identify individual objects, which, in conjunction with differing fluorophore photoproperties, likely accounts for our improved ability to localize the Atto647N fluorophore compared to the larger beads filled with a distinct fluorophore (17). Future adaptations and refinements may provide further insight into how best to characterize objects potentially smaller than nanoscope PSF. Nevertheless, multiple experimental approaches consistently localized Atto647N fluorophores to single 20 nm pixels. Regardless of sampling and quantification approach for FWHM, the nanoscope resolution is more than sufficient for downstream analyses of fluorophore spread because these analyses apply distinct image transformations to detect gross changes in fluorescence summation. FWHM calculation error arising from the encountered challenges would therefore not impact algorithm performance or data interpretation, which instead relies on relative comparisons to intrinsic biologic controls.

Despite the reliance on single pixel intensities to capture fluorescence emission signal, our ASA analysis indicates that the geometric spread of protein spatial arrangements can be accurately inferred with high probability at larger pixel sampling sizes (Fig. 5). Although a multivalent IgG platform is a known requirement for C1q binding, inadequate understanding of C1q binding site geometries, combined with uncertainty regarding the position of the secondary fluorophores, precludes any further benefit from higher sampling resolutions. Furthermore, regardless of pixel size, an ASA analysis would require additional understanding of the summation of fluorescence emission distributions as the optical resolution needed to resolve single antibodies is unlikely to be achieved given the small size of a single antibody independent of superresolution imaging approach.

In our biologic model, multiple solutions for each ASA score are possible as each rAb has the potential to bind one of multiple vacant epitopes. Consequently, a range of fluorescence summation patterns are expected for each ASA score and the relationship between the calculated and actual ASA scores will be dependent on the overall complexity of the summation patterns across the entire array. As a result, linearity will be lost with more complex summation patterns; however, a basic understanding of these patterns allows for normalization. Importantly, the consistency of algorithm performance at variable levels of array saturation demonstrates that the detection of all pixels

containing a fluorophore is not a prerequisite for accurate detection of AQP4 rAb protein cluster formation.

The relationship between threshold levels and raw ASA score distributions (Fig. S3) demonstrate that the observed fluorophore spatial arrangements are primarily driven by the target epitope and not the labeling approach. As a result, a small sampling of events should be sufficient to provide a robust quantification, potentially failing when the threshold becomes biased to capture only the most complex spatial arrangements (Fig. S3). Furthermore, the magnitude between the number of false positives and false negatives was relatively consistent until these higher threshold intensities were reached (Fig. 5 B). The observations suggest that successful algorithm application is not necessarily limited to a small range of threshold values, despite the inability to achieve 100% sensitivity. Further testing in other experimental environments is required to understand how generalizable the algorithm may be and to identify additional algorithms to dissect fluorophore summation patterns. Additional approaches were not pursued in this study given our well-defined imaging environment and our initial success with the ASA scoring system.

### AQP4 autoantibodies in neuromyelitis optica

Molecular models describing how AQP4 autoantibodies initiate pathologic immune activation may identify novel therapeutic targets in NMO. As anticipated by the work of Phuan et al. (14), larger M23-AQP4 arrays are able to bind multiple AQP4 rAb at high density in spatial arrangements that would support multivalent contacts with the complement protein C1q. However, some AQP4 rAb appear to have increased abilities to form multivalent contacts with C1q, indicated by a larger mean object size and a higher frequency of ASA scores 3 and 4. The epitope-dependent variation in antibody cluster size and distribution establishes that antibody-specificity, in addition to AQP4 membrane organization, impacts complement activation in NMO.

A better understanding of the molecular mechanisms driving rAb cluster assembly is needed to determine the functional significance of the observed rAb binding patterns. Indeed, some rAb formed consistently larger clusters independent of antibody concentration. The observation indicates that an unappreciated molecular mechanism likely stabilizes the organization of some, but not all, AQP4 rAb clusters and that some epitopes are able to orient bound antibodies to engage this mechanism (12,20). An unanticipated implication of this finding is that identical ASA scores between rAb may actually reflect organized and unique molecular antibody assemblies that drive stable multivalent C1q contact and activation.

In conclusion, we were able to image two unique plasma membrane structures at high resolution using STED nanoscopy and model variable patterns of antibody clustering in relation to epitope specificity and AQP4 array assembly.

Future investigations that correlate these spatial arrangements with additional functional studies of C1q activation may provide a framework to understand how AQP4-IgG promotes tissue destruction in neuromyelitis optica. Expanding this approach to additional model systems may facilitate the development of novel algorithms to dissect larger protein assemblies at lower lateral resolutions and advance our understanding of the organization and function of protein clusters.

## SUPPORTING MATERIAL

Supporting Materials and Methods and three figures are available at [http://www.biophysj.org/biophysj/supplemental/S0006-3495\(17\)30331-4](http://www.biophysj.org/biophysj/supplemental/S0006-3495(17)30331-4).

## AUTHOR CONTRIBUTIONS

J.L.B. conceived the project. J.N.S. performed experiments. H.S. produced all rAb. J.N.S. and S.A.M. performed STED imaging and analyzed data. J.N.S., S.A.M., E.A.G., D.R., and J.L.B. contributed to analysis design, wrote, and edited the manuscript.

## ACKNOWLEDGMENTS

This study was funded by the Guthy-Jackson Charitable Foundation, a National Multiple Sclerosis Society collaborative grant, the NIH (grants No. NEI EY022936, No. NIAID UM1AI110498, No. NINDS NS048154 P30 Nanoscopy Core, and No. S10 RR023381) and the National Science Foundation (grant No. DBI-1337573). J.N.S. is a trainee of and has received support from the Medical Scientist Training Program at the University of Colorado Anschutz Medical Campus.

## SUPPORTING CITATIONS

References (37–44) appear in the [Supporting Material](#).

## REFERENCES

1. Abbe, E. 1873. Beiträge zur theorie des mikroskops und der mikroskopischen wahrnehmung. *In* Archiv für Mikroskopische Anatomie. University of Michigan, Ann Arbor, MI, pp. 413–418.
2. Hell, S. W. 2007. Far-field optical nanoscopy. *Science*. 316:1153–1158.
3. Hell, S. W., and J. Wichmann. 1994. Breaking the diffraction resolution limit by stimulated emission: stimulated-emission-depletion fluorescence microscopy. *Opt. Lett.* 19:780–782.
4. Willig, K. I., S. O. Rizzoli, ..., S. W. Hell. 2006. STED microscopy reveals that synaptotagmin remains clustered after synaptic vesicle exocytosis. *Nature*. 440:935–939.
5. Chojnacki, J., T. Staudt, ..., H. G. Kräusslich. 2012. Maturation-dependent HIV-1 surface protein redistribution revealed by fluorescence nanoscopy. *Science*. 338:524–528.
6. Heller, I., G. Sitters, ..., G. J. Wuite. 2013. STED nanoscopy combined with optical tweezers reveals protein dynamics on densely covered DNA. *Nat. Methods*. 10:910–916.
7. Lau, L., Y. L. Lee, ..., W. E. Moerner. 2012. STED microscopy with optimized labeling density reveals 9-fold arrangement of a centriole protein. *Biophys. J.* 102:2926–2935.
8. Papadopoulos, M. C., J. L. Bennett, and A. S. Verkman. 2014. Treatment of neuromyelitis optica: state-of-the-art and emerging therapies. *Nat. Rev. Neurol.* 10:493–506.
9. Ratelade, J., N. Asavapanumas, ..., A. S. Verkman. 2013. Involvement of antibody-dependent cell-mediated cytotoxicity in inflammatory demyelination in a mouse model of neuromyelitis optica. *Acta Neuropathol.* 126:699–709.
10. Ratelade, J., H. Zhang, ..., A. S. Verkman. 2012. Neuromyelitis optica IgG and natural killer cells produce NMO lesions in mice without myelin loss. *Acta Neuropathol.* 123:861–872.
11. Phuan, P.-W., H. Zhang, ..., A. S. Verkman. 2013. C1q-targeted monoclonal antibody prevents complement-dependent cytotoxicity and neuropathology in in vitro and mouse models of neuromyelitis optica. *Acta Neuropathol.* 125:829–840.
12. Gaboriaud, C., W. L. Ling, ..., V. Rossi. 2014. Deciphering the fine details of c1 assembly and activation mechanisms: “mission impossible”? *Front. Immunol.* 5:565.
13. Holers, V. M. 2014. Complement and its receptors: new insights into human disease. *Annu. Rev. Immunol.* 32:433–459.
14. Phuan, P.-W., J. Ratelade, ..., A. S. Verkman. 2012. Complement-dependent cytotoxicity in neuromyelitis optica requires aquaporin-4 protein assembly in orthogonal arrays. *J. Biol. Chem.* 287:13829–13839.
15. Bennett, J. L., C. Lam, ..., B. Hemmer. 2009. Intrathecal pathogenic anti-aquaporin-4 antibodies in early neuromyelitis optica. *Ann. Neurol.* 66:617–629.
16. Owens, G. P., A. Ritchie, ..., J. L. Bennett. 2015. Mutagenesis of the aquaporin 4 extracellular domains defines restricted binding patterns of pathogenic neuromyelitis optica IgG. *J. Biol. Chem.* 290:12123–12134.
17. Meyer, S. A., B. N. Ozbay, ..., E. A. Gibson. 2016. Super-resolution imaging of ciliary microdomains in isolated olfactory sensory neurons using a custom two-color stimulated emission depletion microscope. *J. Biomed. Opt.* 21:66017.
18. Furman, C. S., D. A. Gorelick-Feldman, ..., J. E. Rash. 2003. Aquaporin-4 square array assembly: opposing actions of M1 and M23 isoforms. *Proc. Natl. Acad. Sci. USA*. 100:13609–13614.
19. Verkman, A. S., P. W. Phuan, ..., L. Tradtrantip. 2013. Biology of AQP4 and anti-AQP4 antibody: therapeutic implications for NMO. *Brain Pathol.* 23:684–695.
20. Crane, J. M., C. Lam, ..., A. S. Verkman. 2011. Binding affinity and specificity of neuromyelitis optica autoantibodies to aquaporin-4 M1/M23 isoforms and orthogonal arrays. *J. Biol. Chem.* 286:16516–16524.
21. Fahmy, M. F., G. M. Abdel Raheem, ..., O. F. Fahmy. 2012. A new fast iterative blind deconvolution algorithm. *J. Signal Inf. Process.* 3:98–108.
22. Diebold, C. A., F. J. Beurskens, ..., P. W. Parren. 2014. Complement is activated by IgG hexamers assembled at the cell surface. *Science*. 343:1260–1263.
23. Crane, J. M., and A. S. Verkman. 2009. Determinants of aquaporin-4 assembly in orthogonal arrays revealed by live-cell single-molecule fluorescence imaging. *J. Cell Sci.* 122:813–821.
24. Crane, J. M., J. L. Bennett, and A. S. Verkman. 2009. Live cell analysis of aquaporin-4 m1/m23 interactions and regulated orthogonal array assembly in glial cells. *J. Biol. Chem.* 284:35850–35860.
25. Rossi, A., T. J. Moritz, ..., A. S. Verkman. 2012. Super-resolution imaging of aquaporin-4 orthogonal arrays of particles in cell membranes. *J. Cell Sci.* 125:4405–4412.
26. Ido, S., H. Kimiya, ..., H. Yamada. 2014. Immunoactive two-dimensional self-assembly of monoclonal antibodies in aqueous solution revealed by atomic force microscopy. *Nat. Mater.* 13:264–270.
27. Preiner, J., N. Kodera, ..., P. Hinterdorfer. 2014. IgGs are made for walking on bacterial and viral surfaces. *Nat. Commun.* 5:4394.
28. Smith, A. J., and A. S. Verkman. 2015. Superresolution imaging of aquaporin-4 cluster size in antibody-stained paraffin brain sections. *Biophys. J.* 109:2511–2522.
29. Donnert, G., J. Keller, ..., S. W. Hell. 2006. Macromolecular-scale resolution in biological fluorescence microscopy. *Proc. Natl. Acad. Sci. USA*. 103:11440–11445.

30. Westphal, V., M. A. Lauterbach, ..., S. W. Hell. 2007. Dynamic far-field fluorescence nanoscopy. *New J. Phys.* 435:1–10.
31. Galiani, S., B. Harke, ..., P. Bianchini. 2012. Strategies to maximize the performance of a STED microscope. *Opt. Express.* 20:7362–7374.
32. Harke, B., J. Keller, ..., S. W. Hell. 2008. Resolution scaling in STED microscopy. *Opt. Express.* 16:4154–4162.
33. Gould, T. J., P. A. Pellett, and J. Bewersdorf. 2013. STED microscopy. In *Fluorescence Microscopy: From Principles to Biological Applications*. John Wiley & Sons, Hoboken, NJ.
34. Farahani, J. N., M. J. Schibler, and L. A. Bentolila. 2010. Stimulated emission depletion (STED) microscopy: from theory to practice. In *Microscopy: Science, Technology, Applications and Education*. A. Mendez-Vilas and J. Diaz, editors. Formatex Research Center, Badajoz, Spain.
35. Göttfert, F., C. A. Wurm, ..., S. W. Hell. 2013. Coaligned dual-channel STED nanoscopy and molecular diffusion analysis at 20 nm resolution. *Biophys. J.* 105:L01–L03.
36. Westphal, V., and S. W. Hell. 2005. Nanoscale resolution in the focal plane of an optical microscope. *Phys. Rev. Lett.* 94:143903.
37. Saphire, E. O., P. W. Parren, ..., I. A. Wilson. 2001. Crystal structure of a neutralizing human IGG against HIV-1: a template for vaccine design. *Science.* 293:1155–1159.
38. Ho, J. D., R. Yeh, ..., R. M. Stroud. 2009. Crystal structure of human aquaporin 4 at 1.8 Å and its mechanism of conductance. *Proc. Natl. Acad. Sci. USA.* 106:7437–7442.
39. Gaboriaud, C., J. Juanhuix, ..., G. J. Arlaud. 2003. The crystal structure of the globular head of complement protein C1q provides a basis for its versatile recognition properties. *J. Biol. Chem.* 278:46974–46982.
40. Okuyama, K., C. Hongo, ..., H. P. Bächinger. 2009. High-resolution structures of collagen-like peptides [(Pro-Pro-Gly) 4-Xaa-Yaa-Gly-(Pro-Pro-Gly) 4]: implications for triple-helix hydration and Hyp(X) puckering. *Biopolymers.* 91:361–372.
41. Rainey, J. K., and M. C. Goh. 2002. A statistically derived parameterization for the collagen triple-helix. *Protein Sci.* 11:2748–2754.
42. Wildanger, D., R. Medda, ..., S. W. Hell. 2009. A compact STED microscope providing 3D nanoscale resolution. *J. Microsc.* 236:35–43.
43. Fish, D. A., A. M. Brincombe, ..., J. G. Walker. 1995. Blind deconvolution by means of the Richardson-Lucy algorithm. *J. Opt. Soc. Am. A.* 12:58–65.
44. Pinteric, L., R. H. Painter, and G. E. Connell. 1971. Ultrastructure of the Fc fragment of human immunoglobulin G. *Immunochemistry.* 8:1041–1045.

**Biophysical Journal, Volume 112**

**Supplemental Information**

**Determining the Spatial Relationship of Membrane-Bound Aquaporin-4  
Autoantibodies by STED Nanoscopy**

**John N. Soltys, Stephanie A. Meyer, Hannah Schumann, Emily A. Gibson, Diego Restrepo, and Jeffrey L. Bennett**

## **SUPPORTING MATERIAL:**

Determining the spatial relationship of membrane bound anti-aquaporin-4 autoantibodies by STED nanoscopy

John N Soltys<sup>1</sup>, Stephanie A Meyer<sup>2</sup>, Hannah Schumann<sup>3</sup>, Emily A Gibson<sup>2</sup>, Diego Restrepo<sup>4</sup>, Jeffrey L Bennett<sup>3,5</sup>

<sup>1</sup>Medical Scientist Training and Neuroscience Graduate Training Programs, University of Colorado Anschutz Medical Campus, Aurora CO, USA

<sup>2</sup>Department of Bioengineering, University of Colorado Anschutz Medical Campus, Aurora CO, USA

<sup>3</sup>Department of Neurology, University of Colorado Anschutz Medical Campus, Aurora CO, USA

<sup>4</sup>Department of Cell and Developmental Biology, University of Colorado Anschutz Medical Campus, Aurora CO, USA

<sup>5</sup>Department of Ophthalmology, University of Colorado Anschutz Medical Campus, Aurora CO, USA

### **Materials and Methods**

Antibodies: Recombinant monoclonal anti-AQP4 antibodies were produced from plasmablasts isolated from the cerebrospinal fluid of neuromyelitis optica patients [1]. Antigen and epitope specificities were identified as described [1, 2]. Four monoclonal recombinant antibodies (AQP4 rAbs #53, #58, #186, and #153) with unique epitope specificities [2] were selected for this study. For rAbs #53, #58, and #186, the E345R point mutation was introduced into the Fc region by site-directed mutagenesis (Life Technologies) and confirmed by DNA sequencing. The E345R mutation promotes the ordered assembly of antibodies on surface targets [3].

Crystal Schematics: Crystal structures of IgG1 (PDB ID: 1HZH) [4], AQP4 (PDB ID: 3GD8) [5], C1q globular head (PDB ID: 1PK6) [6], and collagen (PDB ID: 2D3H) [7] were used to generate schematics. C1q was assembled by approximating globular head/collagen assemblies based on known structures [6, 8]. For simplicity, the collagen stalk is removed from all C1q structures.

### Sample Preparation and Immunohistochemistry:

*Live Cell Staining:* M1- and M23-AQP4 expressing CHO cells were cultured as described [2] and plated on #1.5 laminin-coated glass coverslips (neuVITRO). The following day, media was washed twice, and AQP4 rAbs (2ug/mL and 10ug/mL) were bound to living cells for 30 minutes. Cells were then fixed in 4% PFA containing 0.1% glutaraldehyde for 15 minutes at 4C. Biotinylated Fab anti-human Fc domain (Novus Biologics) was used to detect bound AQP4 rAb and rabbit polyclonal antibody against the intracellular C-terminal domain of AQP4 (Santa Cruz) was used to label AQP4 tetramers and arrays. Primary antibodies were detected using streptavidin-conjugated Atto647N (Atto-tec) and goat anti-rabbit STAR 590 (Rockland Inc.).

Coverslips were mounted using ProLong Gold (LifeTech) supplemented with 2.5% DABCO, and rested 24 hours prior to imaging.

*Fluorescent Beads and Atto647N:* .02 $\mu$ m Fluospheres® carboxylate-modified microspheres filled with dark red fluorescent fluorophores (660/680; ThermoFisher F8783) were diluted and randomly immobilized onto poly-l-lysine coated #1.5 coverslips for 10 seconds. Mean bead diameter was reported as 28 +/- 4.6 nm by the manufacturer for the obtained Lot. Coverslips were mounted onto a glass slide +/- Atto647N fluorophore diluted serially in 1x PBS. 1x PBS in the absence of fluorophores was added to the mounting media for samples containing beads only.

Imaging with STED Nanoscope: Confocal and STED imaging was performed using the described home-built two-color STED nanoscope at the Anschutz Medical Campus Light Microscopy Core [9]. All images were generated with a pixel size of 19.52x19.52 nm unless otherwise specified. The color channels were initially designed for Atto 590 and Atto 647N fluorophores, and previously referred to as “Atto590 Channel” and “Atto647N Channel” although additional fluorophores may also be imaged in the designated channels. Here, we delineate the imaged fluorophores (Atto590, Atto647N, and dark red 660/680 that fills beads) instead of the instrument channel.

Analysis and Statistics: All image analyses and simulations were performed with MATLAB\_R2015a and MATLAB\_R2016b software (The MathWorks, Inc) using scripts coded in-house. Script integrity for rAb analyses was confirmed by comparing script data output for all image quantifications (as described below) with known distributions on artificially generated images containing multiple scenarios for pixel intensity organizations. Data was imported into Graphpad Prism 6 software to generate plots and perform statistical tests.

***Fluorescent Bead +/- Atto647N Images:***

Image Acquisition/Experimental Approach: At least 3 coverslips were made for each experimental condition and each coverslip was imaged in at least 2 locations (total of at least n=6 images analyzed for all experimental groups). The focal plane was determined by focusing on the 28 nm fluorescent beads. 3 coverslips were prepared without any fluorescent beads/fluorophores and were imaged at multiple planes to calculate background machine noise, after first sampling for the plane in which the most background signal could be detected. Confocal images were acquired first, followed by STED images. For repetitive imaging in the same field of view (3 images), STED imaging began immediately after sample focusing. Excitation power was 10 $\mu$ W and STED power 20mW.

Fluorescent Peak Analysis and Determination of Mean Peak FWHM: Images of 28nm beads alone were analyzed as described for 45nm polystyrene beads [9]. Briefly, all peaks within an image were identified, extracted as an 11 x 11 pixel ROI, and fit to a least squares 2D Gaussian using a MATLAB program. However, the peak finding algorithm encountered problems in this study when analyzing objects smaller in size than those previously imaged [9]. Therefore, we returned to the standard approach of manual peak selection within the images [10-15] to quantify the appearance of Atto647N fluorophores imaged in the same focal plane as the larger 28nm beads. Identified peaks were fit to a least squares 2D Gaussian, the mean FWHM in the x and y

planes were quantified and averaged to calculate mean peak FWHM. Atto647N fluorophores were treated as point sources and mean peak FWHM calculations did not involve deconvolution.

### ***AQP4 rAb Images:***

**Image Processing:** The image processing approach was to first identify where AQP4 is expressed on the target cell using the intracellular AQP4 label (STAR590 channel), generate regions of interest (ROIs) by applying size inclusion (M23-AQP4) or size exclusion (M1-AQP4) filters to identify or eliminate OAPs respectively, and then analyze the spatial distributions of extracellular AQP4 autoantibodies (647N channel) within all ROIs. To maximize the number of detected autoantibodies (therefore minimizing analysis bias from low frequency spatial distributions of potential biologic significance), the 590 channel was not further processed beyond background noise subtraction with all remaining pixels containing an intensity value considered positive for an AQP4 tetramer. Stricter quantification did not change the data analysis (data not shown), likely attributable to the extensive processing criteria for scoring the Atto647N channel as described below.

**AQP4 Tetramer and Array Analysis:** On M1-AQP4, AQP4 tetramer clusters, at least 4 pixels in size, were identified and excluded from further analysis as these may represent leaky, low level M23-AQP4 expression and would potentially confound the analysis [16]. On M23-AQP4, OAPs that were at least 8 pixels in size were included to run all analyses. All included pixels were then used to mask the Atto647N channel to perform all analyses. At least n=3 cells per antibody were analyzed.

**Quantification of rAb clustering via  $FWHM^{rAb\ spread}$ :** A non-biased deconvolution algorithm was applied across the entire Atto647N image to eliminate user-bias, with the goal of quantifying gross object appearance across an entire image based on a maximum likelihood algorithm [17]. The output was a 2-dimensional array; the FWHM of a fit of this array to a 2D Gaussian distribution was calculated and termed  $FWHM^{rAb\ spread}$ , as distinct from the mean peak FWHM calculation discussed above. Although the predominant fluorescence signal drives the goodness of fit, it is possible that the calculation is driven by a smaller fraction of the fluorescence signal otherwise needed to recognize and quantify all image objects by eye. This could potentially produce a smaller than expected  $FWHM^{rAb\ spread}$ . Regardless, any observed shift in  $FWHM^{rAb\ spread}$  distribution represents a relative change in AQP4 rAb cluster size, because a larger  $FWHM^{rAb\ spread}$  could only be generated from the same Atto647N fluorescence signal via summation of multiple fluorophores confined within a small surface area.

This analysis requires user input of the estimated mean object size, which was obtained by imaging Atto647N fluorophore alone and randomly immobilized antibodies as detailed above. However, this size is not necessarily reflective of the size of larger fluorophore densities that may label larger antibody clusters, therefore the analysis was repeated with multiple user estimations of object size. User object size approximations were the pixel dimensions for a 2-dimensional array, containing enough pixels in each dimension to fit a 2 dimensional Gaussian +/- 3 standard deviations from Gaussian peak.

For each experimental group, the calculated  $FWHM^{rAb\ spread}$  met the following criteria: 1) the output array for all images had a general Gaussian appearance, i.e., a center peak bordered with

lesser values, 2) the calculated FWHM came from an array meeting the minimum size requirements to fit the respective Gaussian, and 3) the calculated  $\text{FWHM}^{\text{rAb spread}}$  remained constant with increasing sizes of the user-input size estimate. The calculated  $\text{FWHM}^{\text{rAb spread}}$  of each image was then averaged with the remaining images for each experimental group. For statistical comparisons, a one-way ANOVA was performed with Tukey's test for multiple comparisons (adjusted  $p < .05$  considered significant, comparison  $\alpha = .05$ ).

Generation of Simulated Images to Determine of the Localization Efficiency of Fluorophores in Non-Resolvable Clusters: To analyze the spatial arrangements of bound autoantibodies in more detail, a scoring system was developed (as described below) whose application is dependent on the accurate localization of an individual fluorophore(s) to a single pixel. A data simulation was designed comparing known, random distributions of fluorophores (represented as a binary image) to the theoretical STED image obtained by that distribution. Fluorophores were modeled as being 12 nm in size, with random positioning requiring at least a 12 nm spacing between events. A cell was simulated with 100 distinct OAPs, and a random fluorophore distribution was generated over each OAP. To generate the theoretical STED image, each fluorophore was convolved to model the theoretical photon detection pattern based on the array appearance for autoantibody #58, and background noise was simulated. The representation of autoantibody #58 was selected because it closely resembles that of Atto647N alone, and the mean object size was consistent for both M1-AQP4 and M23-AQP4. STED pixel dimensions were then super-imposed, with each pixel representing the total sum of all photons in the pixel area.

Threshold Analysis of Simulated Images: After generating the simulated STED images, all pixels for the 647 channel (detecting simulated fluorophore distributions) contained a pixel intensity. We therefore asked if a threshold value could be applied that would accurately resolve fluorophore signal from background noise. Images were first deconvolved using the deconvolution algorithm array output for rAb #58 (see above), using a Lucy-Richardson deconvolution algorithm [18]. A series of simulations was performed in which the threshold intensity was increased at 5% increments starting at 5%, where any pixels with an intensity value below the threshold percent compared to the maximum pixel value on the OAP were reassigned a value of zero to exclude the point from the analysis. All remaining pixels were considered to contain a fluorophore. The resulting data set was compared to the binary STED image representing the true locations of all pixels containing fluorophores. For each image, the sensitivity (defined as the number of correctly identified fluorophore-containing pixels), false positive percentage (defined as the number of incorrectly identified fluorophore-containing pixels over the total number of identified pixels), and false negative rates (defined as the number of incorrectly missed fluorophore-containing pixels) were calculated.

Generation of the Antibody Spatial Arrangement (ASA) Score: A scoring system was developed to rank each pixel containing a fluorophore (as determined above) based on the potential for that pixel to participate in a multivalent interaction with the immune protein C1q. The ASA scale was devised based on approximate sizes of C1q-antibody complexes as previously reported from crystallization and cryo-EM studies [3, 19], compared with the size of each STED pixel. An ASA score of 1 represents an isolated pixel with no surrounding intensity signal, ASA Score 2: 2/4 pixels containing signal, ASA Score 3: 3/4 pixels containing signal, and ASA Score 4: 4/4 pixels containing signal. Each pixel received a final score based on the maximum possible ASA



score it could receive over a 2x2 pixel area, out of the 4 possible scores it could have been assigned.

The accuracy and sensitivity of this scoring system was tested by data simulation. A random distribution of fluorophores was generated and thresholded as described above (n=10 cells). ASA scores were then calculated for both the predicted localizations, and compared with the respective binary image. The initial ASA score demonstrated a systematic bias. A non-linear fit was applied to ASA scores 1 and 4, which were first normalized. Scores of 2 and 3 were normalized based on the final percent scored as a 1 or 4. The final scoring algorithm was tested on a second data simulation (n=10 cells), with results representing the goodness-of-fit for a linear regression of each ASA score.

ASA Scoring of Bound AQP4 Autoantibodies: All 647N images were deconvolved and thresholded as described above, using a 40% threshold. For M23-AQP4, each OAP across the entire image was scored individually with data output representing the mean percentage of ASA scores across all OAPs. M1-AQP4 does not form OAPs, therefore the ASA score was calculated across the entire cell. Data output represents the average ASA score distributions calculated for all images in the dataset. Cumulative ASA score distributions were compared using a Mann-Whitney test.

To identify how M23-AQP4 ASA image analysis may be impacted by threshold percentage value, deconvolved and raw were stepped through a series of thresholds and ASA score was calculated without score normalization.

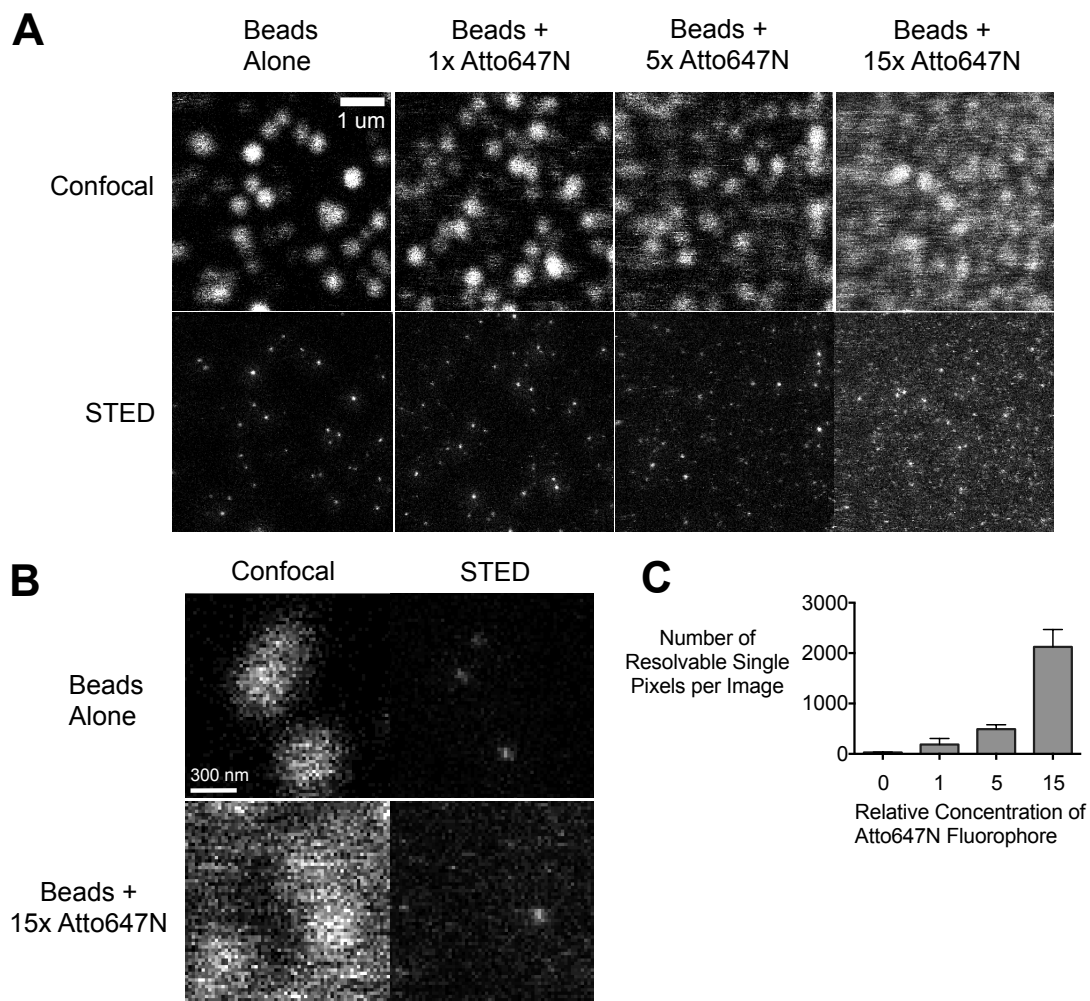

**Supplemental Figure 1: Serial dilutions of Atto647N imaged in the same focal plane as 28nm beads**

(A): Representative confocal (top) and STED (bottom) images of Atto647N fluorophores imaged in the same focal plane as 28nm beads. The concentration of beads was held constant across all coverslips while the concentration of Atto647N was serially diluted. The stated concentration represents the relative amount of Atto647N fluorophore on the respective coverslip. The scale bar in the top left image represents 1um and applies to all images. (B): Representative high magnification confocal and STED images for coverslips containing beads alone and for coverslips containing beads in addition to 15x Atto647N fluorophore. Scale bar in top left image represents 300nm and applies to all images. (C) The number of objects with fluorescent signal predominantly localizing over a single pixel was quantified for each image to ask if fluorophores may localize to single pixels, given that the majority of the signal attributable to fluorophores appeared to localize over single pixels as the concentration of Atto647N fluorophore increased. The number of resolvable single pixels increased in proportion to the concentration of fluorophores, supporting single pixel localization. Data is presented as the number of objects identified per individual image with n=6 images analyzed for each experimental group.

## 28nm Beads Alone

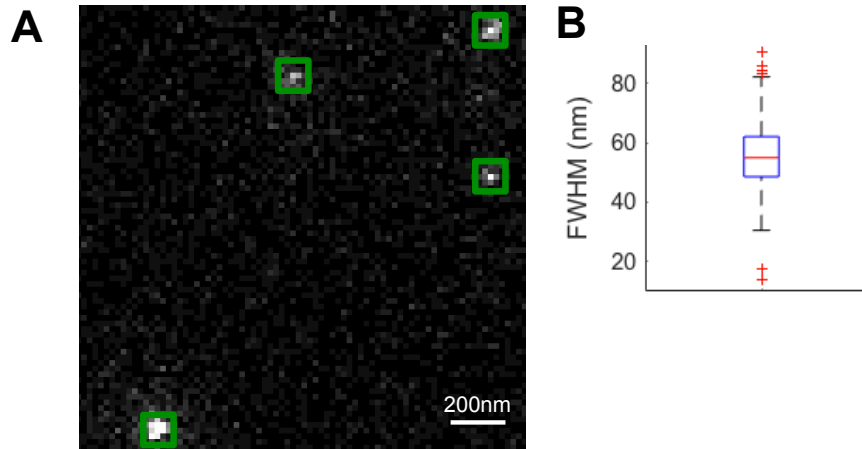

## 28nm Beads + 5x Atto647N Fluorophore

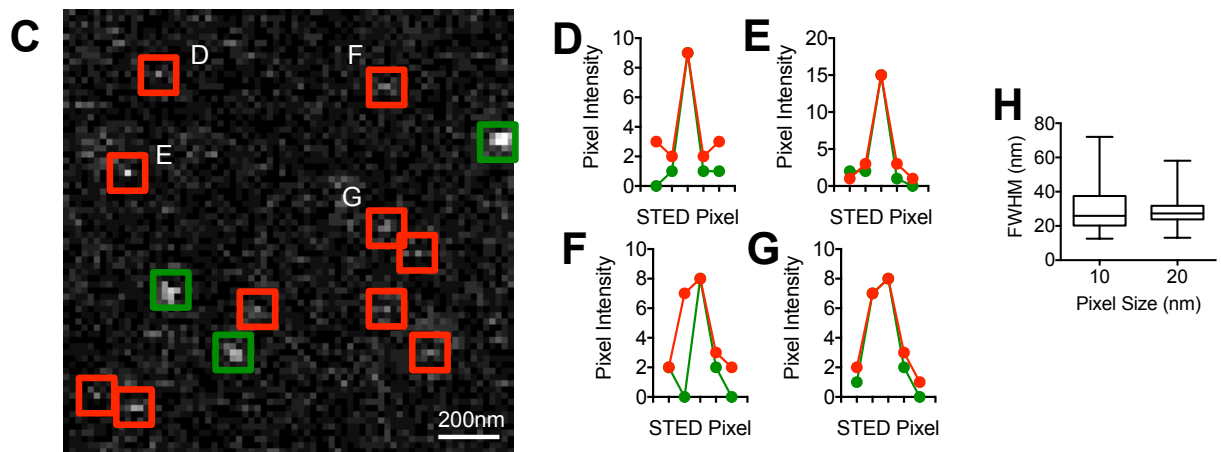

### Supplemental Figure 2: Quantifying Atto647N fluorophore appearance

A representative image of a coverslip containing only beads filled with dark red 660/680 fluorophore is depicted in (A), scale bar = 200nm and pixel size = 20nm. Objects identified as beads are outlined in green. A mean peak FWHM of 55 +/- 11nm for a least squares 2D Gaussian fit was calculated for n=458 beads compiled across 6 images (B). However, the appearance of the distinct Atto647N fluorophore was of particular interest as the fluorophore labeled AQP4 rAb in the imaging model. A representative coverslip containing 5x Atto647N fluorophore in addition to 28nm beads filled with the distinct dark red 660/680 fluorophore is depicted in (C), scale bar = 200nm and pixel size = 20nm. All Atto647N fluorophore peaks must have a pixel intensity brighter than the brightest pixel identified when imaging blank coverslips to be considered for analysis, potentially biasing the calculation towards the brightest peaks. All qualified objects are outlined in red, larger objects identified by eye more consistent with the appearance of the larger beads are outlined in green. Importantly, both images (A) and (C) are sampled with identical criteria and no pixels in (A) appeared as isolated pixels that met sampling criteria to merit a red outline. All objects in the top half of image (C) are labeled D-G; pixel

intensity across the x and y direction is respectively plotted in (D-G). The box and whiskers plots depicted in (H) show the calculated mean peak FWHM for a least squares 2D Gaussian fit when sampling at 10 and 20 nm pixel sizes; calculated means are  $28.2 \pm 7.3$  (n=146) and  $28.7 \pm 11.0$  nm (n=156) respectively.

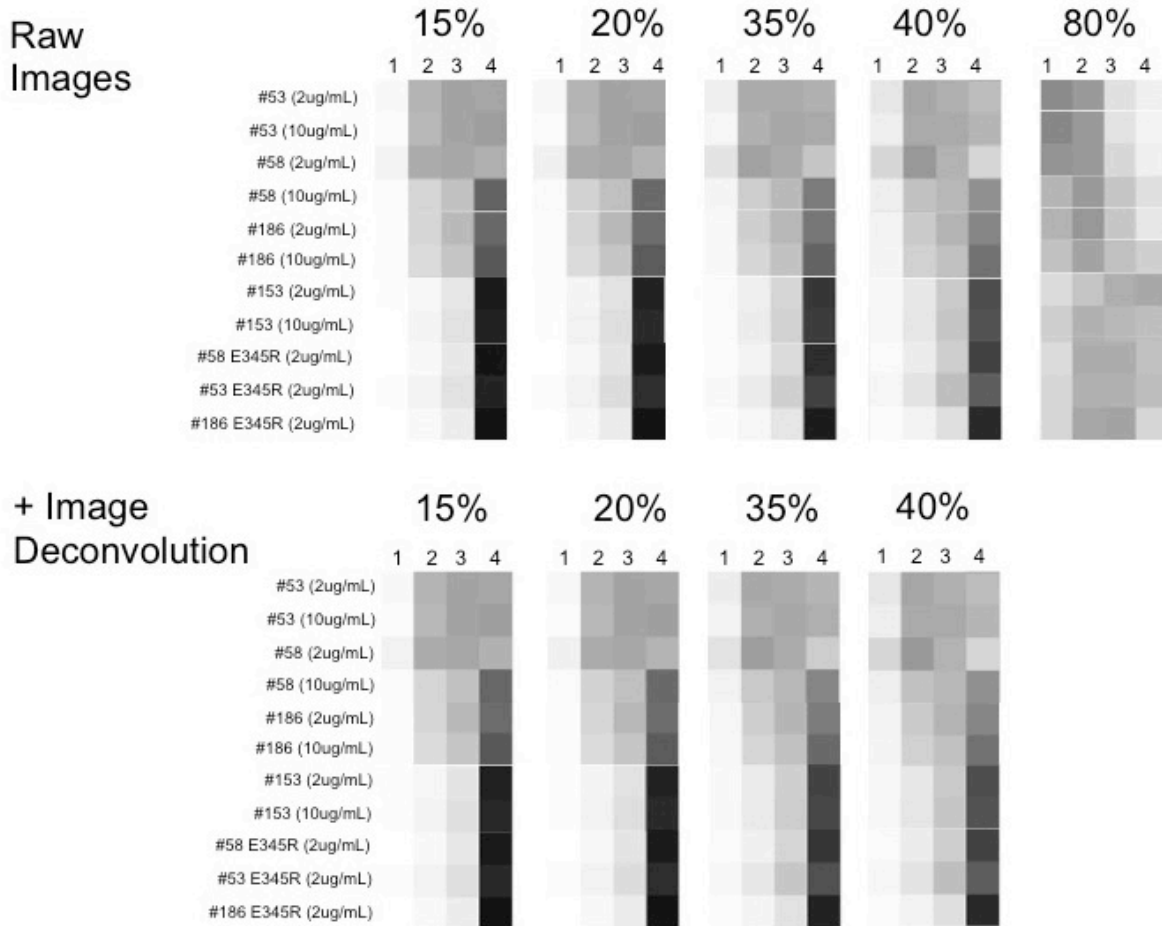

**Supplemental Figure 3: ASA algorithm performance at a range of threshold intensities.** Initial ASA score distributions were calculated at a range of threshold intensities on raw images (top) and on deconvolved images (bottom). The threshold percentage is indicated over the respective ASA score set.

## SUPPORTING REFERENCES

1. Bennett, J.L., et al., *Intrathecal pathogenic anti-aquaporin-4 antibodies in early neuromyelitis optica*, in *Ann. Neurol.* 2009. p. 617-629.
2. Owens, G.P., et al., *Mutagenesis of the aquaporin 4 extracellular domains defines restricted binding patterns of pathogenic neuromyelitis optica IgG.*, in *J. Biol. Chem.* 2015. p. 12123-12134.
3. Diebold, C.A., et al., *Complement is activated by IgG hexamers assembled at the cell surface.*, in *Science.* 2014. p. 1260-1263.
4. Saphire, E.O., et al., *Crystal structure of a neutralizing human IGG against HIV-1: a template for vaccine design.*, in *Science.* 2001. p. 1155-1159.
5. Ho, J.D., et al., *Crystal structure of human aquaporin 4 at 1.8 Å and its mechanism of conductance*, in *Proceedings of the ....* 2009.
6. Gaboriaud, C., et al., *The Crystal Structure of the Globular Head of Complement Protein C1q Provides a Basis for Its Versatile Recognition Properties*, in *Journal of Biological Chemistry.* 2003. p. 46974-46982.
7. Okuyama, K., et al., *High-resolution structures of collagen-like peptides [(Pro-Pro-Gly) 4-Xaa-Yaa-Gly-(Pro-Pro-Gly) 4]: Implications for triple-helix hydration and Hyp(X) puckering*, in *Biopolymers.* 2009. p. 361-372.
8. Rainey, J.K. and M.C. Goh, *A statistically derived parameterization for the collagen triple-helix*, in *Protein Science.* 2002.
9. Meyer, S.A., et al., *Super-resolution imaging of ciliary microdomains in isolated olfactory sensory neurons using a custom two-color stimulated emission depletion microscope.* *Journal of Biomedical Optics*, 2016. **21**(6): p. 066017-066017.
10. Wildanger, D., et al., *A compact STED microscope providing 3D nanoscale resolution.*, in *J Microsc.* 2009. p. 35-43.
11. Donnert, G., J. Keller, and R. Medda, *Macromolecular-scale resolution in biological fluorescence microscopy*, in *Proceedings of the ....* 2006.
12. Westphal, V., et al., *Dynamic far-field fluorescence nanoscopy*, in *New J. Phys.* 2007, IOP Publishing. p. 435.
13. Galiani, S., et al., *Strategies to maximize the performance of a STED microscope.*, in *Opt Express.* 2012. p. 7362-7374.
14. Willig, K.I., et al., *STED microscopy reveals that synaptotagmin remains clustered after synaptic vesicle exocytosis.*, in *Nature.* 2006. p. 935-939.
15. Harke, B., et al., *Resolution scaling in STED microscopy*, in *Optics ....* 2008.
16. Furman, C.S., et al., *Aquaporin-4 square array assembly: opposing actions of M1 and M23 isoforms.*, in *Proc. Natl. Acad. Sci. U.S.A.* 2003. p. 13609-13614.
17. Fahmy, M.F., et al., *A New Fast Iterative Blind Deconvolution Algorithm*, in *Journal of Signal and Information Processing.* 2012, Scientific Research Publishing. p. 98.
18. Fish DA, B.A., Pike ER, Walker JG, *Blind Deconvolution by Means of the Richardson-Lucy Algorithm.* *Journal of the Optical Society of America a-Optics Image Science and Vision*, 1995(12).
19. Pinteric, L., R.H. Painter, and G.E. Connell, *Ultrastructure of the Fc fragment of human immunoglobulin G.*, in *Immunochemistry.* 1971. p. 1041-1045.
